# Supplementary material for: Multiscale computational analysis of the effect of end group modification on PM6:BTP-x OSCs performance
Source: Royal Society of Chemistry journal article supplement (doi:10.1039/d4tc02361g), 2024-01-01
Supplement: d4tc02361g1.pdf [file d4tc02361g1.pdf]

## Supporting Information

# Multiscale computational analysis of molecular stacking and charge transfer mechanisms on the performance of PM6: BTP-x OSCs

Qingxing Wu, <sup>†a</sup> Chongchen Xiang, <sup>†a</sup> Guangjun Zhang <sup>a\*</sup>, Yingping Zou, <sup>b\*</sup> and Wanqiang Liu <sup>a\*</sup>

a. School of Chemistry and Chemical Engineering, Hunan Province Key Laboratory of Controllable Preparation and Functional Application of Fine Polymers, Hunan University of Science and Technology, Xiangtan 411201, China

b. College of Chemistry and Chemical Engineering, Central South University, Changsha 410083, China

\*E-mail: wanqiangliu@hnust.edu.cn (W Liu); yingpingzou@csu.edu.cn; guangjzhang@hnust.edu.cn

## Computational methods and Marcus theory

The charge transfer process of D-A molecules can be approximated as the following two processes, the donor molecules change from neutral to cationic by electron transfer after excitation; The acceptor molecule changes from neutral to anion through hole transfer after excitation. The charge transfer rates constant  $k_{CT}$  for the CT states can be estimated according to the semiclassical Marcus theory as follows.

$$k_{CT} = \frac{2\pi}{\hbar} |V_{DA}|^2 \frac{1}{\sqrt{4\pi\lambda T k_B}} \exp\left[-\frac{(\Delta G + \lambda)^2}{4T\lambda k_B}\right] \quad (1)$$

In Eq. 1,  $\hbar$  is the approximate Planck constant;  $k_B$  is the Boltzmann constant;  $T$  is the temperature, set to 298.15 K;  $V_{DA}$  denotes the generalized Mulliken-Hush (GMH)<sup>1</sup> method to calculate the electronic coupling;  $\lambda$  is the reorganization energy (including the internal recombination  $\lambda_i$  energy and the external reorganization energy  $\lambda_s$ ). For the D/A dimer, internal reorganization energy can be calculated using Eq. 2.<sup>2</sup>

$$\lambda_i = \frac{\lambda_{i1} + \lambda_{i2}}{2} \quad (2)$$

For hole transfer:

$$\lambda_{i1} = [E^0 D^+ + E^* A^-] - [E^0 D^0 + E^* A^-] \quad (3)$$

$$\lambda_{i2} = [E^+ D^0 + E^- A^*] - [E^+ D^+ + E^- A^-] \quad (4)$$

For electron transfer:

$$\lambda_{i1} = [E^* D^+ + E^* A^-] - [E^0 D^0 + E^* A^*] \quad (5)$$

$$\lambda_{i2} = [E^+ D^* + E^- A^0] - [E^+ D^+ + E^- A^-] \quad (6)$$

where  $E^*/E^0/E^+/E^-$  refer to the energy of excited/basic/cationic/anionic states, respectively;  $D^*/D^0/D^+$  denotes the equilibrium geometry of the donor molecule in excited/basic/cationic states;  $A^*/A^0/A^-$  denotes the equilibrium geometry of the acceptor molecule in excited/basic/anionic states.

In Eq. 1,  $\Delta G$  is the difference of the Gibbs free energy during the exciton separation process. The  $\Delta G$  can be calculated using the Rehm-Weller equation<sup>3,4</sup> as follows.

$$\Delta G_{CS} = -\Delta G_{CR} - \Delta E_{S_1} - \Delta E_b \quad (7)$$

In Eq. 7,  $\Delta E_{S_1}$  is the first excitation energy of the donor and  $\Delta E_b$  is the exciton binding energy.

In Eq. 1  $V_{DA}$  is the electron coupling integral, which can be calculated by the Generalized Mulliken–Hush (GMH)<sup>5</sup> method as follows.

$$V_{DA} = \frac{\Delta E \mu_{ij}}{\sqrt{\Delta \mu_{ij}^2 + 4\mu_{ij}^2}} \quad (8)$$

In Eq.8,  $\Delta E$  is the excitation energy difference between the initial and final states;  $\mu$  is the leap dipole moment between the initial and final states;  $\Delta \mu_{ij}$  is the dipole moment difference between the initial and final states.

$$E_b = E_g^{fund} - E_g^{opt} \quad (9)$$

$$E_g^{fund} = IP - EA \quad (10)$$

In Eq.9,  $\Delta E_b$  is defined as the energy difference between the fundamental band gap and the optical band gap, and  $E_{opt}$  refers to the energy level difference from  $S_0$  to  $S_1$ .  $E_{fund}$  in Eq.10 refers to the difference between ionization energy and affinity energy, the units of both  $E_{fund}$  and  $E_{opt}$  are chosen as eV.

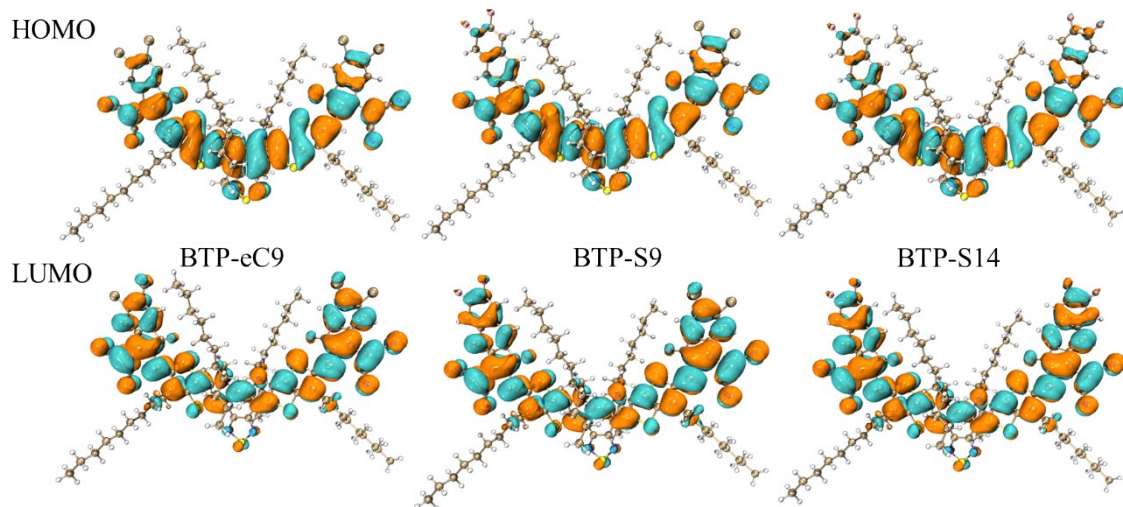

**Figure S1** The electron density distribution of HOMO and LUMO orbitals of BTP-eC9, BTP-S9 and BTP-S14 molecules (iso-value=0.005 a.u.)

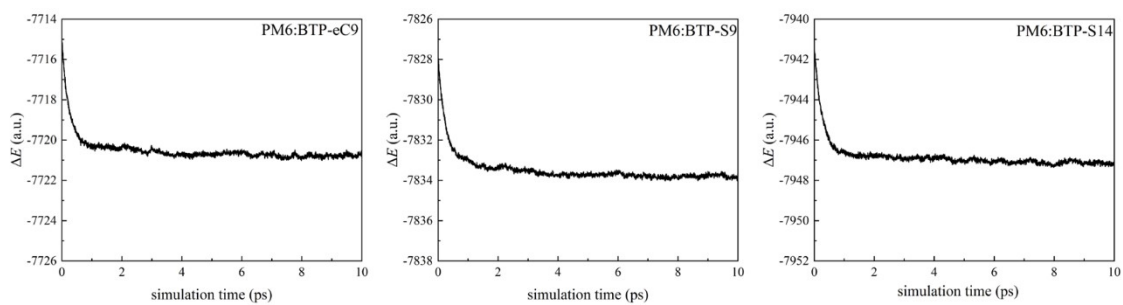

**Figure S2** The plots between the potential energy and simulation time in PM6: BTP-x systems during annealing process

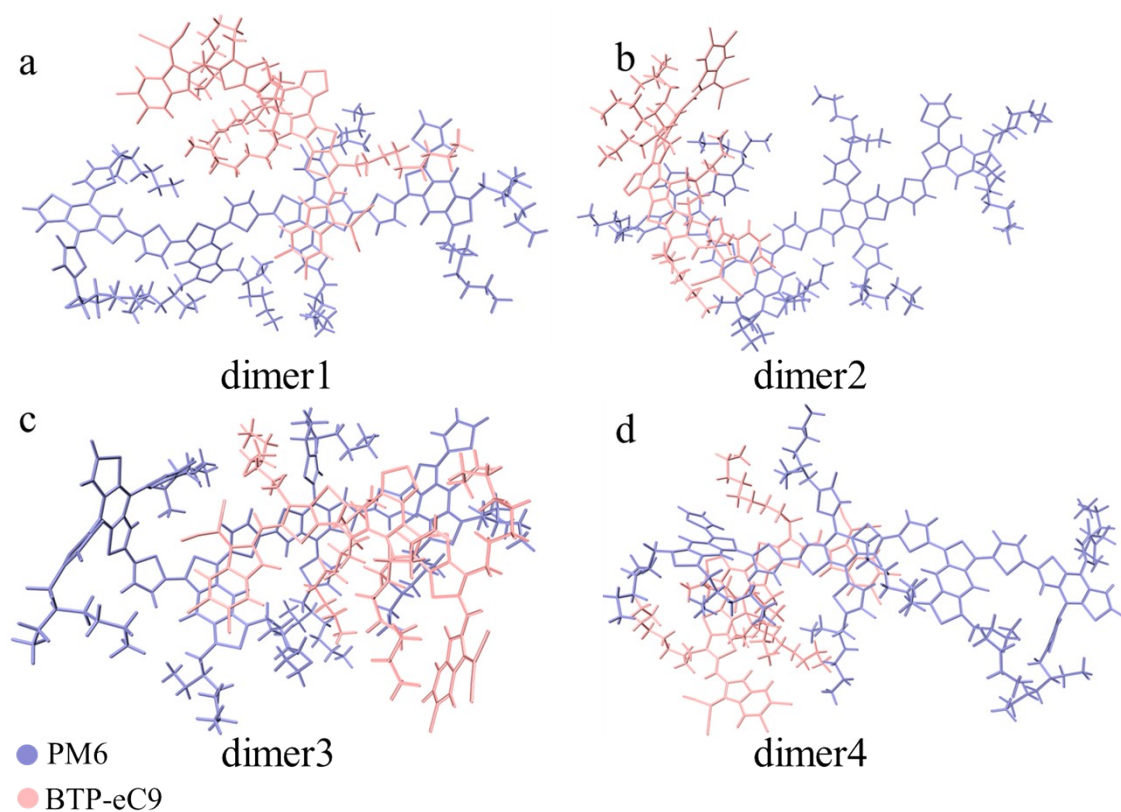

**Figure S3** Top view of PM6: BTP-eC9 dimers

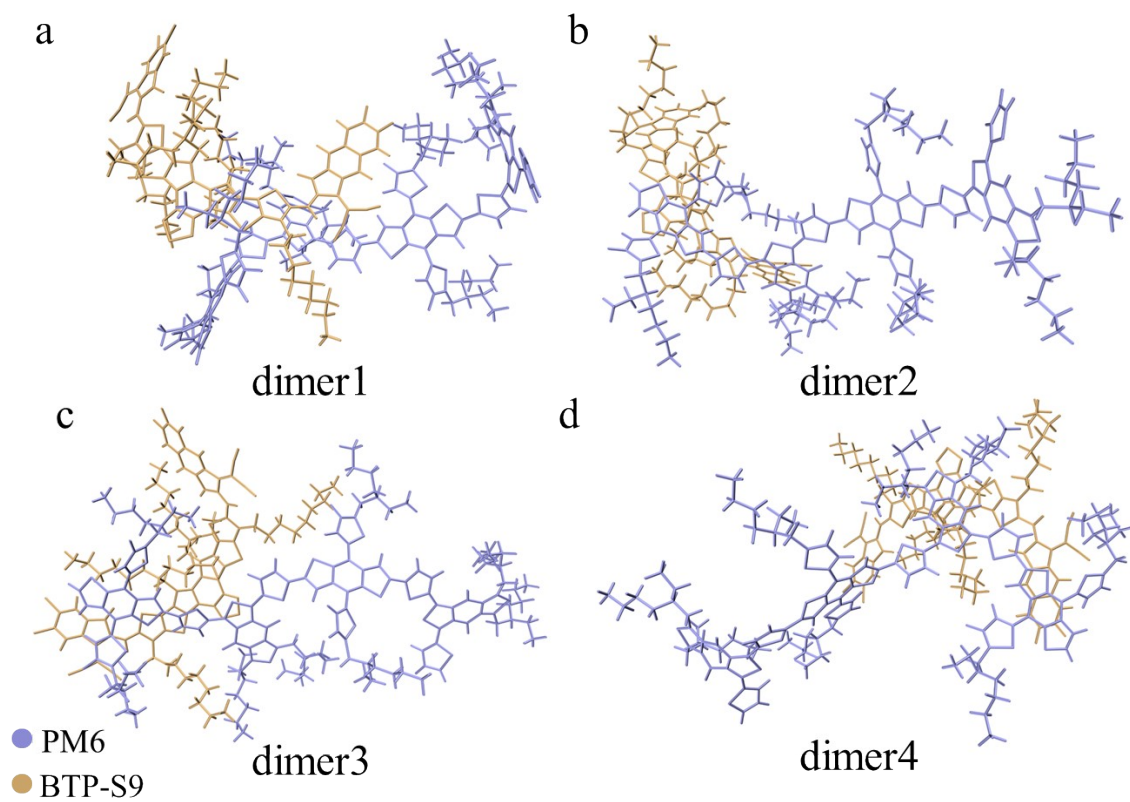

**Figure S4** Top view of PM6: BTP-S9 dimers

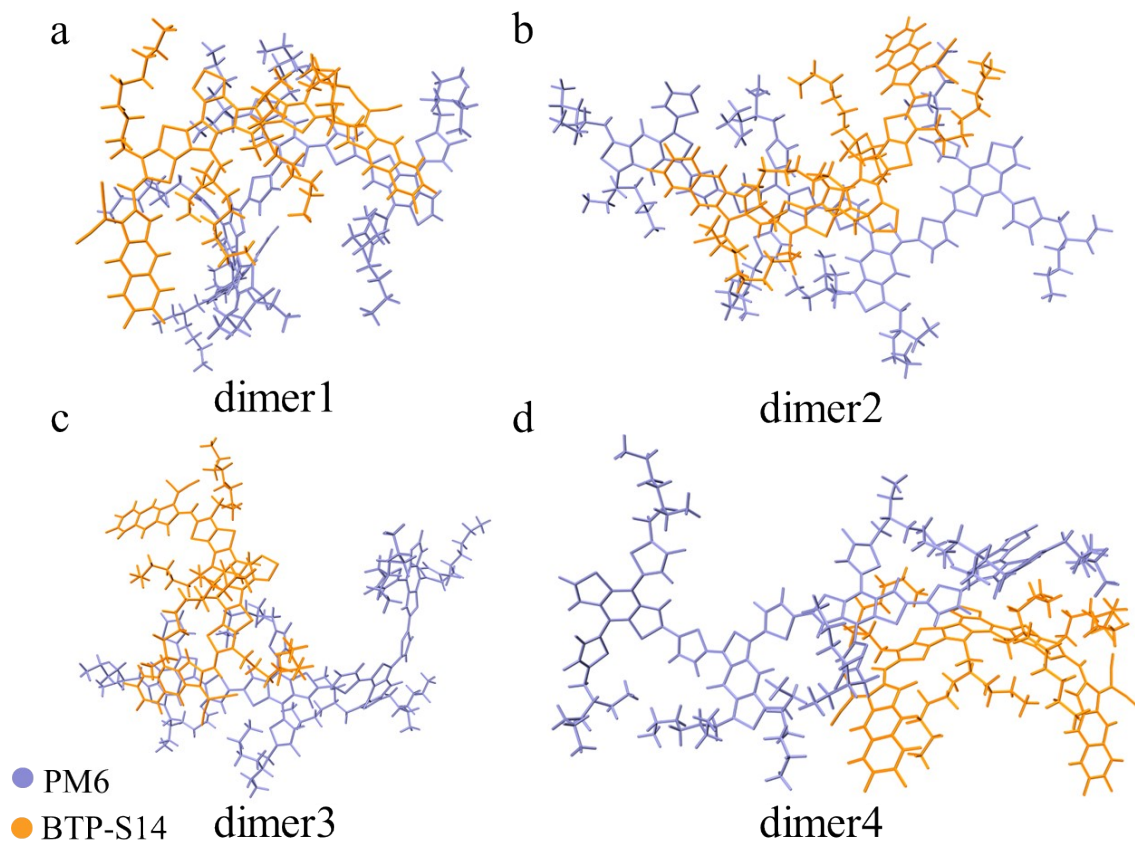

**Figure S5** Top view of PM6: BTP-S14 dimers

**Table S1** The open circuit voltage ( $V_{OC}$ ), short circuit ( $J_{SC}$ ) and fill factor (FF) of PM6: BTP-x OSCs

| Blend films  | $V_{OC}$ [V] | $J_{SC}$ [Ma cm <sup>-2</sup> ] | FF[%] | PCE[%] |
|--------------|--------------|---------------------------------|-------|--------|
| PM6: BTP-eC9 | 0.845        | 27.57                           | 77.95 | 18.0   |
| PM6: BTP-S9  | 0.853        | 26.72                           | 77.05 | 17.5   |
| PM6: BTP-S14 | 0.855        | 25.07                           | 76.69 | 16.4   |

**Table S2** The excited states information of BTP-eC9 molecule in chloroform solvent calculated by DFT calculation

| Excited states  | $E/eV$ | $\lambda/nm$ | f      | Excited states  | $E/eV$ | $\lambda/nm$ | f      |
|-----------------|--------|--------------|--------|-----------------|--------|--------------|--------|
| S <sub>1</sub>  | 1.6763 | 739.62       | 2.2207 | S <sub>16</sub> | 3.1090 | 398.79       | 0.0000 |
| S <sub>2</sub>  | 2.0005 | 619.78       | 0.1572 | S <sub>17</sub> | 3.1679 | 391.38       | 0.0018 |
| S <sub>3</sub>  | 2.2600 | 548.60       | 0.1108 | S <sub>18</sub> | 3.2281 | 384.08       | 0.0002 |
| S <sub>4</sub>  | 2.3468 | 528.31       | 0.0130 | S <sub>19</sub> | 3.2327 | 383.53       | 0.0842 |
| S <sub>5</sub>  | 2.3540 | 526.71       | 0.0005 | S <sub>20</sub> | 3.2384 | 382.85       | 0.2221 |
| S <sub>6</sub>  | 2.4735 | 501.25       | 0.6651 | S <sub>21</sub> | 3.2666 | 379.55       | 0.0062 |
| S <sub>7</sub>  | 2.5265 | 490.73       | 0.0956 | S <sub>22</sub> | 3.3048 | 375.16       | 0.0028 |
| S <sub>8</sub>  | 2.6338 | 470.74       | 0.0767 | S <sub>23</sub> | 3.3128 | 374.26       | 0.0102 |
| S <sub>9</sub>  | 2.6834 | 462.04       | 0.0027 | S <sub>24</sub> | 3.3223 | 373.19       | 0.0008 |
| S <sub>10</sub> | 2.7260 | 454.82       | 0.0353 | S <sub>25</sub> | 3.3417 | 371.02       | 0.0009 |
| S <sub>11</sub> | 2.8570 | 433.96       | 0.0042 | S <sub>26</sub> | 3.3604 | 368.96       | 0.0753 |
| S <sub>12</sub> | 2.9565 | 419.36       | 0.0467 | S <sub>27</sub> | 3.4003 | 364.63       | 0.0275 |
| S <sub>13</sub> | 3.0342 | 408.62       | 0.0505 | S <sub>28</sub> | 3.4723 | 357.06       | 0.0960 |
| S <sub>14</sub> | 3.0388 | 408.00       | 0.0122 | S <sub>29</sub> | 3.4883 | 355.43       | 0.0708 |
| S <sub>15</sub> | 3.0760 | 403.07       | 0.0378 | S <sub>30</sub> | 3.5368 | 350.55       | 0.0249 |

**Table S3** The excited states information of BTP-S9 molecule in chloroform solvent calculated by DFT calculation

| Excited states  | $E/eV$ | $\lambda/nm$ | f      | Excited states  | $E/eV$ | $\lambda/nm$ | f      |
|-----------------|--------|--------------|--------|-----------------|--------|--------------|--------|
| S <sub>1</sub>  | 1.6663 | 744.08       | 2.2445 | S <sub>16</sub> | 3.0699 | 403.87       | 0.0012 |
| S <sub>2</sub>  | 2.0076 | 617.59       | 0.2176 | S <sub>17</sub> | 3.0738 | 403.35       | 0.0414 |
| S <sub>3</sub>  | 2.2857 | 542.44       | 0.0705 | S <sub>18</sub> | 3.1052 | 399.29       | 0.0256 |
| S <sub>4</sub>  | 2.3560 | 526.25       | 0.0011 | S <sub>19</sub> | 3.1764 | 390.33       | 0.0111 |
| S <sub>5</sub>  | 2.4310 | 510.01       | 0.4746 | S <sub>20</sub> | 3.2375 | 382.97       | 0.0156 |
| S <sub>6</sub>  | 2.5227 | 491.48       | 0.1453 | S <sub>21</sub> | 3.2460 | 381.96       | 0.1781 |
| S <sub>7</sub>  | 2.5369 | 488.73       | 0.0863 | S <sub>22</sub> | 3.2663 | 379.58       | 0.0200 |
| S <sub>8</sub>  | 2.6292 | 471.56       | 0.0924 | S <sub>23</sub> | 3.2842 | 377.52       | 0.0708 |
| S <sub>9</sub>  | 2.6768 | 463.19       | 0.0023 | S <sub>24</sub> | 3.3160 | 373.90       | 0.1077 |
| S <sub>10</sub> | 2.7142 | 456.80       | 0.0933 | S <sub>25</sub> | 3.3179 | 373.68       | 0.0275 |
| S <sub>11</sub> | 2.7230 | 455.33       | 0.0668 | S <sub>26</sub> | 3.3354 | 371.73       | 0.0127 |
| S <sub>12</sub> | 2.8642 | 432.87       | 0.0088 | S <sub>27</sub> | 3.3789 | 366.94       | 0.0329 |
| S <sub>13</sub> | 2.9659 | 418.03       | 0.0578 | S <sub>28</sub> | 3.4049 | 364.13       | 0.0221 |

|                 |        |        |        |                 |        |        |        |
|-----------------|--------|--------|--------|-----------------|--------|--------|--------|
| S <sub>14</sub> | 3.0120 | 411.64 | 0.0393 | S <sub>29</sub> | 3.4254 | 361.96 | 0.0145 |
| S <sub>15</sub> | 3.0575 | 405.51 | 0.0060 | S <sub>30</sub> | 3.4444 | 359.96 | 0.0668 |

**Table S4** The excited states information of BTP-S14 molecule in chloroform solvent calculated by DFT calculation

| Excited states  | <i>E</i> /eV | $\lambda$ /nm | f      | Excited states  | <i>E</i> /eV | $\lambda$ /nm | f      |
|-----------------|--------------|---------------|--------|-----------------|--------------|---------------|--------|
| S <sub>1</sub>  | 1.6580       | 747.79        | 2.2752 | S <sub>16</sub> | 3.0707       | 403.77        | 0.0237 |
| S <sub>2</sub>  | 2.0211       | 613.45        | 0.2641 | S <sub>17</sub> | 3.0738       | 403.36        | 0.0001 |
| S <sub>3</sub>  | 2.3615       | 525.03        | 0.0036 | S <sub>18</sub> | 3.0748       | 403.23        | 0.0000 |
| S <sub>4</sub>  | 2.4109       | 514.27        | 0.4434 | S <sub>19</sub> | 3.0917       | 401.03        | 0.0026 |
| S <sub>5</sub>  | 2.4684       | 502.29        | 0.0538 | S <sub>20</sub> | 3.1417       | 394.65        | 0.0112 |
| S <sub>6</sub>  | 2.5335       | 489.37        | 0.1256 | S <sub>21</sub> | 3.1784       | 390.08        | 0.1139 |
| S <sub>7</sub>  | 2.5355       | 488.99        | 0.0857 | S <sub>22</sub> | 3.2169       | 385.41        | 0.1534 |
| S <sub>8</sub>  | 2.6214       | 472.97        | 0.1008 | S <sub>23</sub> | 3.2418       | 382.46        | 0.0605 |
| S <sub>9</sub>  | 2.6696       | 464.43        | 0.0083 | S <sub>24</sub> | 3.2758       | 378.48        | 0.0273 |
| S <sub>10</sub> | 2.7127       | 457.05        | 0.0018 | S <sub>25</sub> | 3.2791       | 378.11        | 0.0289 |
| S <sub>11</sub> | 2.7250       | 455.00        | 0.0281 | S <sub>26</sub> | 3.3254       | 372.84        | 0.0090 |
| S <sub>12</sub> | 2.7365       | 453.07        | 0.2366 | S <sub>27</sub> | 3.3471       | 370.42        | 0.2280 |
| S <sub>13</sub> | 2.8693       | 432.11        | 0.0222 | S <sub>28</sub> | 3.3979       | 364.88        | 0.0473 |
| S <sub>14</sub> | 3.0286       | 409.38        | 0.0441 | S <sub>29</sub> | 3.4038       | 364.25        | 0.0347 |
| S <sub>15</sub> | 3.0372       | 408.21        | 0.0012 | S <sub>30</sub> | 3.4270       | 361.79        | 0.0928 |

**Table S5** The excited states information of BTP-eC9-dimer1 calculated by DFT calculation

| Excited states  | <i>E</i> /eV | $\lambda$ /nm | f      | Excited states  | <i>E</i> /eV | $\lambda$ /nm | f      |
|-----------------|--------------|---------------|--------|-----------------|--------------|---------------|--------|
| S <sub>1</sub>  | 1.1150       | 1111.9        | 0.0027 | S <sub>16</sub> | 2.0198       | 613.83        | 0.0409 |
|                 |              | 8             |        |                 |              |               |        |
| S <sub>2</sub>  | 1.3211       | 938.48        | 0.0040 | S <sub>17</sub> | 2.0420       | 607.16        | 0.0993 |
| S <sub>3</sub>  | 1.4082       | 880.44        | 0.0003 | S <sub>18</sub> | 2.0653       | 600.32        | 0.0422 |
| S <sub>4</sub>  | 1.4797       | 837.92        | 0.6332 | S <sub>19</sub> | 2.0974       | 591.14        | 0.1554 |
| S <sub>5</sub>  | 1.5650       | 792.24        | 0.3037 | S <sub>20</sub> | 2.1188       | 585.16        | 0.2189 |
| S <sub>6</sub>  | 1.6243       | 763.32        | 0.5202 | S <sub>21</sub> | 2.1339       | 581.01        | 0.0070 |
| S <sub>7</sub>  | 1.6333       | 759.12        | 0.4633 | S <sub>22</sub> | 2.1552       | 575.28        | 0.1530 |
| S <sub>8</sub>  | 1.6917       | 732.89        | 0.0084 | S <sub>23</sub> | 2.1906       | 565.99        | 0.0862 |
| S <sub>9</sub>  | 1.7133       | 723.66        | 0.0190 | S <sub>24</sub> | 2.2066       | 561.88        | 0.0279 |
| S <sub>10</sub> | 1.7463       | 709.96        | 1.0785 | S <sub>25</sub> | 2.2268       | 556.78        | 0.1200 |
| S <sub>11</sub> | 1.7820       | 695.74        | 0.3570 | S <sub>26</sub> | 2.2404       | 553.40        | 0.0213 |
| S <sub>12</sub> | 1.8570       | 667.67        | 0.0032 | S <sub>27</sub> | 2.2673       | 546.83        | 0.0161 |
| S <sub>13</sub> | 1.9400       | 639.10        | 0.1996 | S <sub>28</sub> | 2.2690       | 546.42        | 0.0509 |
| S <sub>14</sub> | 1.9460       | 637.12        | 0.0018 | S <sub>29</sub> | 2.2717       | 545.78        | 0.2631 |
| S <sub>15</sub> | 2.0006       | 619.73        | 0.0026 | S <sub>30</sub> | 2.2933       | 540.63        | 0.2878 |

**Table S6** The excited states information of BTP-eC9-dimer2 calculated by DFT calculation

| Excited states  | $E/eV$ | $\lambda/nm$ | f      | Excited states  | $E/eV$ | $\lambda/nm$ | f      |
|-----------------|--------|--------------|--------|-----------------|--------|--------------|--------|
| S <sub>1</sub>  | 1.1881 | 1043.52      | 0.0008 | S <sub>16</sub> | 2.0065 | 617.91       | 0.0121 |
| S <sub>2</sub>  | 1.4183 | 874.18       | 0.0003 | S <sub>17</sub> | 2.0279 | 611.41       | 0.0040 |
| S <sub>3</sub>  | 1.4296 | 867.24       | 0.0007 | S <sub>18</sub> | 2.0407 | 607.56       | 0.3067 |
| S <sub>4</sub>  | 1.6176 | 766.47       | 1.0025 | S <sub>19</sub> | 2.0947 | 591.90       | 0.5103 |
| S <sub>5</sub>  | 1.6254 | 762.79       | 0.0120 | S <sub>20</sub> | 2.1405 | 579.24       | 0.0003 |
| S <sub>6</sub>  | 1.6600 | 746.90       | 1.0677 | S <sub>21</sub> | 2.1551 | 575.32       | 0.0009 |
| S <sub>7</sub>  | 1.6683 | 743.18       | 0.5966 | S <sub>22</sub> | 2.1671 | 572.12       | 0.0389 |
| S <sub>8</sub>  | 1.6792 | 738.34       | 0.2434 | S <sub>23</sub> | 2.1751 | 570.02       | 0.1422 |
| S <sub>9</sub>  | 1.7081 | 725.86       | 0.0015 | S <sub>24</sub> | 2.1825 | 568.08       | 0.1264 |
| S <sub>10</sub> | 1.8133 | 683.76       | 0.2378 | S <sub>25</sub> | 2.1864 | 567.06       | 0.0020 |
| S <sub>11</sub> | 1.8192 | 681.53       | 0.0043 | S <sub>26</sub> | 2.2450 | 552.26       | 0.1220 |
| S <sub>12</sub> | 1.8796 | 659.63       | 0.0001 | S <sub>27</sub> | 2.2651 | 547.36       | 0.0247 |
| S <sub>13</sub> | 1.8999 | 652.59       | 0.0008 | S <sub>28</sub> | 2.2828 | 543.12       | 0.0002 |
| S <sub>14</sub> | 1.9082 | 649.74       | 0.0310 | S <sub>29</sub> | 2.2922 | 540.90       | 0.1271 |
| S <sub>15</sub> | 1.9141 | 647.74       | 0.2931 | S <sub>30</sub> | 2.3012 | 538.77       | 0.0001 |

**Table S7** The excited states information of BTP-eC9-dimer3 calculated by DFT calculation

| Excited states  | $E/eV$ | $\lambda/nm$ | f      | Excited states  | $E/eV$ | $\lambda/nm$ | f      |
|-----------------|--------|--------------|--------|-----------------|--------|--------------|--------|
| S <sub>1</sub>  | 1.2280 | 1009.65      | 0.0093 | S <sub>16</sub> | 2.0979 | 590.99       | 0.1546 |
| S <sub>2</sub>  | 1.4129 | 877.49       | 0.0136 | S <sub>17</sub> | 2.1051 | 588.98       | 0.0272 |
| S <sub>3</sub>  | 1.4730 | 841.69       | 0.0016 | S <sub>18</sub> | 2.1473 | 577.39       | 0.0061 |
| S <sub>4</sub>  | 1.5886 | 780.48       | 0.7937 | S <sub>19</sub> | 2.1623 | 573.39       | 0.0386 |
| S <sub>5</sub>  | 1.6682 | 743.23       | 0.0045 | S <sub>20</sub> | 2.1741 | 570.28       | 0.0148 |
| S <sub>6</sub>  | 1.6836 | 736.43       | 0.1377 | S <sub>21</sub> | 2.1931 | 565.34       | 0.1055 |
| S <sub>7</sub>  | 1.7273 | 717.78       | 0.0023 | S <sub>22</sub> | 2.2291 | 556.21       | 0.1208 |
| S <sub>8</sub>  | 1.7655 | 702.25       | 0.0420 | S <sub>23</sub> | 2.2426 | 552.87       | 0.0047 |
| S <sub>9</sub>  | 1.8080 | 685.74       | 0.2255 | S <sub>24</sub> | 2.2517 | 550.63       | 0.0245 |
| S <sub>10</sub> | 1.8752 | 661.19       | 1.1119 | S <sub>25</sub> | 2.2641 | 547.60       | 0.0132 |
| S <sub>11</sub> | 1.8991 | 652.84       | 0.0010 | S <sub>26</sub> | 2.2668 | 546.96       | 0.0468 |
| S <sub>12</sub> | 1.9351 | 640.71       | 0.0115 | S <sub>27</sub> | 2.2743 | 545.16       | 0.0570 |
| S <sub>13</sub> | 1.9533 | 634.74       | 0.0327 | S <sub>28</sub> | 2.3143 | 535.74       | 0.0524 |
| S <sub>14</sub> | 1.9929 | 622.14       | 0.0082 | S <sub>29</sub> | 2.3265 | 532.92       | 0.0432 |
| S <sub>15</sub> | 2.0809 | 595.83       | 0.1353 | S <sub>30</sub> | 2.3418 | 529.45       | 0.0955 |

**Table S8** The excited states information of BTP-eC9-dimer4 calculated by DFT calculation

| Excited states | $E/eV$ | $\lambda/nm$ | f      | Excited states  | $E/eV$ | $\lambda/nm$ | f      |
|----------------|--------|--------------|--------|-----------------|--------|--------------|--------|
| S <sub>1</sub> | 1.1310 | 1096.22      | 0.0213 | S <sub>16</sub> | 2.0695 | 599.11       | 0.0715 |
| S <sub>2</sub> | 1.3385 | 926.32       | 0.0045 | S <sub>17</sub> | 2.0915 | 592.79       | 0.0057 |
| S <sub>3</sub> | 1.4754 | 840.34       | 0.0163 | S <sub>18</sub> | 2.1051 | 588.97       | 0.0017 |
| S <sub>4</sub> | 1.5156 | 818.04       | 0.1148 | S <sub>19</sub> | 2.1409 | 579.11       | 0.0823 |
| S <sub>5</sub> | 1.6091 | 770.52       | 1.1212 | S <sub>20</sub> | 2.1540 | 575.61       | 0.1117 |
| S <sub>6</sub> | 1.6540 | 749.61       | 0.0116 | S <sub>21</sub> | 2.1803 | 568.65       | 0.0786 |



|                 |        |        |        |                 |        |        |        |
|-----------------|--------|--------|--------|-----------------|--------|--------|--------|
| S <sub>7</sub>  | 1.7023 | 728.34 | 1.4841 | S <sub>22</sub> | 2.2045 | 562.42 | 0.1477 |
| S <sub>8</sub>  | 1.7194 | 721.10 | 0.0060 | S <sub>23</sub> | 2.2161 | 559.47 | 0.0185 |
| S <sub>9</sub>  | 1.8025 | 687.85 | 0.0112 | S <sub>24</sub> | 2.2258 | 557.03 | 0.0251 |
| S <sub>10</sub> | 1.8660 | 664.45 | 0.0286 | S <sub>25</sub> | 2.2362 | 554.44 | 0.0150 |
| S <sub>11</sub> | 1.8780 | 660.19 | 0.2050 | S <sub>26</sub> | 2.2691 | 546.40 | 0.0229 |
| S <sub>12</sub> | 1.9020 | 651.85 | 0.0919 | S <sub>27</sub> | 2.2921 | 540.92 | 0.1189 |
| S <sub>13</sub> | 1.9154 | 647.29 | 0.0059 | S <sub>28</sub> | 2.3101 | 536.71 | 0.0090 |
| S <sub>14</sub> | 2.0247 | 612.36 | 0.1719 | S <sub>29</sub> | 2.3262 | 532.98 | 0.2045 |
| S <sub>15</sub> | 2.0324 | 610.05 | 0.0358 | S <sub>30</sub> | 2.3736 | 522.35 | 0.0959 |

**Table S9** The excited states information of BTP-S9-dimer1 calculated by DFT calculation

| Excited states  | <i>E</i> /eV | $\lambda$ /nm | f      | Excited states  | <i>E</i> /eV | $\lambda$ /nm | f      |
|-----------------|--------------|---------------|--------|-----------------|--------------|---------------|--------|
|                 | 1.3439       | 922.54        | 0.0151 | S <sub>16</sub> | 2.2663       | 547.07        | 0.0072 |
| S <sub>2</sub>  | 1.5806       | 784.39        | 0.1343 | S <sub>17</sub> | 2.2677       | 546.74        | 0.0253 |
| S <sub>3</sub>  | 1.6007       | 774.58        | 0.0435 | S <sub>18</sub> | 2.2747       | 545.06        | 0.0319 |
| S <sub>4</sub>  | 1.6882       | 734.43        | 1.3559 | S <sub>19</sub> | 2.3146       | 535.67        | 0.0189 |
| S <sub>5</sub>  | 1.8056       | 686.65        | 0.1024 | S <sub>20</sub> | 2.3235       | 533.60        | 0.0060 |
| S <sub>6</sub>  | 1.8864       | 657.24        | 0.0011 | S <sub>21</sub> | 2.3286       | 532.44        | 0.0273 |
| S <sub>7</sub>  | 1.9145       | 647.60        | 0.0148 | S <sub>22</sub> | 2.3476       | 528.13        | 0.0983 |
| S <sub>8</sub>  | 1.9293       | 642.64        | 0.3910 | S <sub>23</sub> | 2.3863       | 519.57        | 0.0071 |
| S <sub>9</sub>  | 2.0338       | 609.63        | 0.1069 | S <sub>24</sub> | 2.3942       | 517.85        | 0.0551 |
| S <sub>10</sub> | 2.0606       | 601.70        | 0.0028 | S <sub>25</sub> | 2.4165       | 513.07        | 0.1571 |
| S <sub>11</sub> | 2.0758       | 597.29        | 0.0308 | S <sub>26</sub> | 2.4354       | 509.09        | 0.2233 |
| S <sub>12</sub> | 2.0885       | 593.66        | 0.2207 | S <sub>27</sub> | 2.4565       | 504.72        | 0.1470 |
| S <sub>13</sub> | 2.1689       | 571.66        | 0.1770 | S <sub>28</sub> | 2.4731       | 501.33        | 0.0269 |
| S <sub>14</sub> | 2.2074       | 561.66        | 0.0731 | S <sub>29</sub> | 2.5030       | 495.34        | 0.0026 |
| S <sub>15</sub> | 2.2196       | 558.59        | 0.6415 | S <sub>30</sub> | 2.5155       | 492.88        | 0.0117 |

**Table S10** The excited states information of BTP-S9-dimer2 calculated by DFT calculation

| Excited states  | <i>E</i> /eV | $\lambda$ /nm | f      | Excited states  | <i>E</i> /eV | $\lambda$ /nm | f      |
|-----------------|--------------|---------------|--------|-----------------|--------------|---------------|--------|
| S <sub>1</sub>  | 1.3298       | 932.33        | 0.0333 | S <sub>16</sub> | 2.1355       | 580.58        | 0.0307 |
| S <sub>2</sub>  | 1.4523       | 853.70        | 0.0231 | S <sub>17</sub> | 2.1551       | 575.30        | 0.1446 |
| S <sub>3</sub>  | 1.5031       | 824.87        | 0.0105 | S <sub>18</sub> | 2.1759       | 569.80        | 0.0003 |
| S <sub>4</sub>  | 1.6199       | 765.36        | 0.0043 | S <sub>19</sub> | 2.1854       | 567.33        | 0.0002 |
| S <sub>5</sub>  | 1.6729       | 741.15        | 1.3021 | S <sub>20</sub> | 2.1985       | 563.94        | 0.0020 |
| S <sub>6</sub>  | 1.7952       | 690.65        | 0.3439 | S <sub>21</sub> | 2.2746       | 545.08        | 0.6376 |
| S <sub>7</sub>  | 1.8002       | 688.73        | 1.1010 | S <sub>22</sub> | 2.2924       | 540.84        | 0.0395 |
| S <sub>8</sub>  | 1.8792       | 659.76        | 0.1557 | S <sub>23</sub> | 2.3007       | 538.91        | 0.0797 |
| S <sub>9</sub>  | 1.9114       | 648.64        | 0.0009 | S <sub>24</sub> | 2.3285       | 532.46        | 0.0210 |
| S <sub>10</sub> | 1.9221       | 645.04        | 0.0217 | S <sub>25</sub> | 2.3300       | 532.13        | 0.0181 |
| S <sub>11</sub> | 1.9524       | 635.02        | 0.0900 | S <sub>26</sub> | 2.3798       | 520.99        | 0.0056 |
| S <sub>12</sub> | 2.0260       | 611.98        | 0.0013 | S <sub>27</sub> | 2.3954       | 517.59        | 0.0067 |
| S <sub>13</sub> | 2.0314       | 610.33        | 0.2560 | S <sub>28</sub> | 2.3965       | 517.35        | 0.0021 |
| S <sub>14</sub> | 2.0776       | 596.75        | 0.2366 | S <sub>29</sub> | 2.3999       | 516.61        | 0.0159 |

|                 |        |        |        |                 |        |        |        |
|-----------------|--------|--------|--------|-----------------|--------|--------|--------|
| S <sub>15</sub> | 2.0827 | 595.29 | 0.0153 | S <sub>30</sub> | 2.4191 | 512.53 | 0.0559 |
|-----------------|--------|--------|--------|-----------------|--------|--------|--------|

**Table S11** The excited states information of BTP-S9-dimer3 calculated by DFT calculation

| Excited states  | <i>E</i> /eV | $\lambda$ /nm | f      | Excited states  | <i>E</i> /eV | $\lambda$ /nm | f      |
|-----------------|--------------|---------------|--------|-----------------|--------------|---------------|--------|
| S <sub>1</sub>  | 1.1957       | 1036.88       | 0.0855 | S <sub>16</sub> | 2.0963       | 591.43        | 0.0187 |
| S <sub>2</sub>  | 1.2995       | 954.12        | 0.0095 | S <sub>17</sub> | 2.1151       | 586.19        | 0.0024 |
| S <sub>3</sub>  | 1.4716       | 842.53        | 0.0785 | S <sub>18</sub> | 2.1399       | 579.39        | 0.0033 |
| S <sub>4</sub>  | 1.4963       | 828.63        | 1.1946 | S <sub>19</sub> | 2.1508       | 576.46        | 0.0933 |
| S <sub>5</sub>  | 1.5989       | 775.45        | 0.0169 | S <sub>20</sub> | 2.1780       | 569.27        | 0.1454 |
| S <sub>6</sub>  | 1.6821       | 737.07        | 0.0403 | S <sub>21</sub> | 2.1839       | 567.73        | 0.1448 |
| S <sub>7</sub>  | 1.7611       | 704.00        | 0.0063 | S <sub>22</sub> | 2.2488       | 551.33        | 0.0017 |
| S <sub>8</sub>  | 1.7888       | 693.12        | 0.1944 | S <sub>23</sub> | 2.2759       | 544.78        | 0.0576 |
| S <sub>9</sub>  | 1.8175       | 682.17        | 0.0004 | S <sub>24</sub> | 2.2768       | 544.56        | 0.0113 |
| S <sub>10</sub> | 1.8935       | 654.78        | 1.2944 | S <sub>25</sub> | 2.2972       | 539.72        | 0.0191 |
| S <sub>11</sub> | 1.9447       | 637.54        | 0.0034 | S <sub>26</sub> | 2.3292       | 532.31        | 0.0267 |
| S <sub>12</sub> | 1.9750       | 627.78        | 0.3374 | S <sub>27</sub> | 2.3319       | 531.70        | 0.0340 |
| S <sub>13</sub> | 1.9949       | 621.51        | 0.0511 | S <sub>28</sub> | 2.3485       | 527.92        | 0.0770 |
| S <sub>14</sub> | 2.0153       | 615.21        | 0.0740 | S <sub>29</sub> | 2.3572       | 525.99        | 0.2456 |
| S <sub>15</sub> | 2.0875       | 593.93        | 0.1109 | S <sub>30</sub> | 2.3632       | 524.64        | 0.4102 |

**Table S12** The excited states information of BTP-S9-dimer4 calculated by DFT calculation

| Excited states  | <i>E</i> /eV | $\lambda$ /nm | f      | Excited states  | <i>E</i> /eV | $\lambda$ /nm | f      |
|-----------------|--------------|---------------|--------|-----------------|--------------|---------------|--------|
| S <sub>1</sub>  | 1.3282       | 933.51        | 0.0534 | S <sub>16</sub> | 2.2135       | 560.14        | 0.0236 |
| S <sub>2</sub>  | 1.4732       | 841.62        | 0.0028 | S <sub>17</sub> | 2.2363       | 554.42        | 0.5713 |
| S <sub>3</sub>  | 1.5844       | 782.55        | 1.7675 | S <sub>18</sub> | 2.2634       | 547.77        | 0.0001 |
| S <sub>4</sub>  | 1.7016       | 728.65        | 0.0367 | S <sub>19</sub> | 2.2799       | 543.82        | 0.1076 |
| S <sub>5</sub>  | 1.7191       | 721.23        | 0.0396 | S <sub>20</sub> | 2.2846       | 542.69        | 0.0176 |
| S <sub>6</sub>  | 1.7935       | 691.31        | 0.0002 | S <sub>21</sub> | 2.3158       | 535.39        | 0.2749 |
| S <sub>7</sub>  | 1.9438       | 637.83        | 0.0972 | S <sub>22</sub> | 2.3432       | 529.13        | 0.1126 |
| S <sub>8</sub>  | 1.9476       | 636.60        | 0.0010 | S <sub>23</sub> | 2.3638       | 524.51        | 0.0090 |
| S <sub>9</sub>  | 2.0217       | 613.26        | 0.2116 | S <sub>24</sub> | 2.3868       | 519.46        | 0.6562 |
| S <sub>10</sub> | 2.0429       | 606.91        | 0.0139 | S <sub>25</sub> | 2.4197       | 512.38        | 0.0022 |
| S <sub>11</sub> | 2.0602       | 601.81        | 0.0076 | S <sub>26</sub> | 2.4258       | 511.12        | 0.0415 |
| S <sub>12</sub> | 2.0864       | 594.24        | 0.0023 | S <sub>27</sub> | 2.4360       | 508.97        | 0.0005 |
| S <sub>13</sub> | 2.1458       | 577.81        | 0.0635 | S <sub>28</sub> | 2.4760       | 500.74        | 0.0329 |
| S <sub>14</sub> | 2.1611       | 573.70        | 0.0330 | S <sub>29</sub> | 2.4765       | 500.64        | 0.0123 |
| S <sub>15</sub> | 2.1755       | 569.92        | 0.1480 | S <sub>30</sub> | 2.4854       | 498.86        | 0.0119 |

**Table S13** The excited states information of BTP-S14-dimer1 calculated by DFT calculation

| Excited states | <i>E</i> /eV | $\lambda$ /nm | f      | Excited states  | <i>E</i> /eV | $\lambda$ /nm | f      |
|----------------|--------------|---------------|--------|-----------------|--------------|---------------|--------|
| S <sub>1</sub> | 1.1818       | 1049.08       | 0.0240 | S <sub>16</sub> | 2.1600       | 573.99        | 0.0298 |
| S <sub>2</sub> | 1.4055       | 882.12        | 0.0095 | S <sub>17</sub> | 2.1717       | 570.92        | 0.2226 |
| S <sub>3</sub> | 1.5470       | 801.47        | 1.0409 | S <sub>18</sub> | 2.1889       | 566.43        | 0.0137 |

|                 |        |        |        |                 |        |        |        |
|-----------------|--------|--------|--------|-----------------|--------|--------|--------|
| S <sub>4</sub>  | 1.5742 | 787.62 | 0.4823 | S <sub>19</sub> | 2.2541 | 550.04 | 0.2233 |
| S <sub>5</sub>  | 1.6102 | 770.01 | 0.4067 | S <sub>20</sub> | 2.2720 | 545.72 | 0.1132 |
| S <sub>6</sub>  | 1.7622 | 703.59 | 0.9346 | S <sub>21</sub> | 2.2777 | 544.33 | 0.1178 |
| S <sub>7</sub>  | 1.7935 | 691.28 | 0.0070 | S <sub>22</sub> | 2.2994 | 539.19 | 0.1172 |
| S <sub>8</sub>  | 1.8158 | 682.80 | 0.0065 | S <sub>23</sub> | 2.3156 | 535.43 | 0.0144 |
| S <sub>9</sub>  | 1.9494 | 636.01 | 0.0225 | S <sub>24</sub> | 2.3544 | 526.61 | 0.1252 |
| S <sub>10</sub> | 1.9685 | 629.84 | 0.1123 | S <sub>25</sub> | 2.3662 | 523.97 | 0.0252 |
| S <sub>11</sub> | 1.9993 | 620.13 | 0.0434 | S <sub>26</sub> | 2.3668 | 523.85 | 0.2761 |
| S <sub>12</sub> | 2.0011 | 619.57 | 0.1406 | S <sub>27</sub> | 2.3785 | 521.26 | 0.0269 |
| S <sub>13</sub> | 2.0696 | 599.08 | 0.1280 | S <sub>28</sub> | 2.3924 | 518.24 | 0.1916 |
| S <sub>14</sub> | 2.1136 | 586.61 | 0.0409 | S <sub>29</sub> | 2.4026 | 516.05 | 0.0623 |
| S <sub>15</sub> | 2.1546 | 575.43 | 0.1772 | S <sub>30</sub> | 2.4171 | 512.95 | 0.0364 |

**Table S14** The excited states information of BTP-S14-dimer2 calculated by DFT calculation

| Excited states  | <i>E</i> /eV | $\lambda$ /nm | f      | Excited states  | <i>E</i> /eV | $\lambda$ /nm | f      |
|-----------------|--------------|---------------|--------|-----------------|--------------|---------------|--------|
| S <sub>1</sub>  | 1.2575       | 985.94        | 0.0143 | S <sub>16</sub> | 2.1529       | 575.91        | 0.0231 |
| S <sub>2</sub>  | 1.4716       | 842.53        | 0.0816 | S <sub>17</sub> | 2.1629       | 573.24        | 0.0077 |
| S <sub>3</sub>  | 1.5857       | 781.90        | 0.7776 | S <sub>18</sub> | 2.2015       | 563.19        | 0.2577 |
| S <sub>4</sub>  | 1.6049       | 772.51        | 0.0537 | S <sub>19</sub> | 2.2241       | 557.47        | 0.1250 |
| S <sub>5</sub>  | 1.6579       | 747.82        | 0.3419 | S <sub>20</sub> | 2.2380       | 554.00        | 0.0263 |
| S <sub>6</sub>  | 1.7314       | 716.08        | 0.2474 | S <sub>21</sub> | 2.2460       | 552.02        | 0.0400 |
| S <sub>7</sub>  | 1.7985       | 689.38        | 0.0455 | S <sub>22</sub> | 2.2801       | 543.076       | 0.2272 |
| S <sub>8</sub>  | 1.8152       | 683.04        | 1.4442 | S <sub>23</sub> | 2.2914       | 541.08        | 0.0292 |
| S <sub>9</sub>  | 1.9130       | 648.11        | 0.2267 | S <sub>24</sub> | 2.3080       | 537.20        | 0.0252 |
| S <sub>10</sub> | 1.9777       | 626.92        | 0.0058 | S <sub>25</sub> | 2.3186       | 534.74        | 0.2216 |
| S <sub>11</sub> | 2.0123       | 616.13        | 0.1186 | S <sub>26</sub> | 2.3349       | 531.00        | 0.1114 |
| S <sub>12</sub> | 2.0315       | 610.30        | 0.0837 | S <sub>27</sub> | 2.3718       | 522.74        | 0.0208 |
| S <sub>13</sub> | 2.0707       | 598.77        | 0.0338 | S <sub>28</sub> | 2.3874       | 519.32        | 0.1218 |
| S <sub>14</sub> | 2.0907       | 593.03        | 0.0025 | S <sub>29</sub> | 2.3934       | 518.03        | 0.0088 |
| S <sub>15</sub> | 2.1188       | 585.15        | 0.0780 | S <sub>30</sub> | 2.4175       | 512.85        | 0.0441 |

**Table S15** The excited states information of BTP-S14-dimer3 calculated by DFT calculation

| Excited states  | <i>E</i> /eV | $\lambda$ /nm | f      | Excited states  | <i>E</i> /eV | $\lambda$ /nm | f      |
|-----------------|--------------|---------------|--------|-----------------|--------------|---------------|--------|
| S <sub>1</sub>  | 1.2773       | 970.70        | 0.0026 | S <sub>16</sub> | 2.1115       | 587.18        | 0.1715 |
| S <sub>2</sub>  | 1.5070       | 822.71        | 0.0042 | S <sub>17</sub> | 2.1292       | 582.32        | 0.1075 |
| S <sub>3</sub>  | 1.6031       | 773.41        | 1.6142 | S <sub>18</sub> | 2.1605       | 573.88        | 0.0001 |
| S <sub>4</sub>  | 1.6296       | 760.83        | 0.0032 | S <sub>19</sub> | 2.1923       | 565.54        | 0.1326 |
| S <sub>5</sub>  | 1.6631       | 745.50        | 1.5350 | S <sub>20</sub> | 2.2597       | 548.67        | 0.1340 |
| S <sub>6</sub>  | 1.7650       | 702.46        | 0.0412 | S <sub>21</sub> | 2.2862       | 542.32        | 0.0050 |
| S <sub>7</sub>  | 1.8010       | 688.44        | 0.0022 | S <sub>22</sub> | 2.3207       | 534.24        | 0.0029 |
| S <sub>8</sub>  | 1.8707       | 662.76        | 0.0010 | S <sub>23</sub> | 2.3337       | 531.27        | 0.0446 |
| S <sub>9</sub>  | 1.9407       | 638.87        | 0.2256 | S <sub>24</sub> | 2.3449       | 528.75        | 0.0013 |
| S <sub>10</sub> | 1.9596       | 632.69        | 0.0416 | S <sub>25</sub> | 2.3508       | 527.41        | 0.1089 |
| S <sub>11</sub> | 1.9711       | 628.99        | 0.0397 | S <sub>26</sub> | 2.3739       | 522.29        | 0.0917 |

|                 |        |        |        |                 |        |        |        |
|-----------------|--------|--------|--------|-----------------|--------|--------|--------|
| S <sub>12</sub> | 1.9932 | 622.03 | 0.2911 | S <sub>27</sub> | 2.3947 | 517.74 | 0.0631 |
| S <sub>13</sub> | 2.0213 | 613.38 | 0.0344 | S <sub>28</sub> | 2.4149 | 513.41 | 0.0290 |
| S <sub>14</sub> | 2.0559 | 603.05 | 0.0007 | S <sub>29</sub> | 2.4334 | 509.50 | 0.0050 |
| S <sub>15</sub> | 2.1024 | 589.74 | 0.1726 | S <sub>30</sub> | 2.4499 | 506.08 | 0.0755 |

**Table S16** The excited states information of BTP-S14-dimer4 calculated by DFT calculation

| Excited states  | $E/eV$ | $\lambda/nm$ | f      | Excited states  | $E/eV$ | $\lambda/nm$ | f      |
|-----------------|--------|--------------|--------|-----------------|--------|--------------|--------|
| S <sub>1</sub>  | 1.3120 | 944.97       | 0.0154 | S <sub>16</sub> | 2.2930 | 540.71       | 0.0594 |
| S <sub>2</sub>  | 1.5681 | 790.66       | 0.0219 | S <sub>17</sub> | 2.2968 | 539.81       | 0.1284 |
| S <sub>3</sub>  | 1.6471 | 752.75       | 0.0034 | S <sub>18</sub> | 2.3051 | 537.87       | 0.0597 |
| S <sub>4</sub>  | 1.6971 | 730.56       | 1.5658 | S <sub>19</sub> | 2.3120 | 536.26       | 0.0010 |
| S <sub>5</sub>  | 1.7953 | 690.61       | 0.1247 | S <sub>20</sub> | 2.3510 | 527.37       | 0.0526 |
| S <sub>6</sub>  | 1.8504 | 1.8504       | 0.0032 | S <sub>21</sub> | 2.3620 | 524.90       | 0.0014 |
| S <sub>7</sub>  | 1.8661 | 664.42       | 0.0010 | S <sub>22</sub> | 2.3664 | 523.94       | 0.1525 |
| S <sub>8</sub>  | 1.9003 | 652.45       | 1.8219 | S <sub>23</sub> | 2.3723 | 522.64       | 0.3174 |
| S <sub>9</sub>  | 2.0442 | 607.12       | 0.0911 | S <sub>24</sub> | 2.4086 | 514.76       | 0.1536 |
| S <sub>10</sub> | 2.0520 | 604.23       | 0.0929 | S <sub>25</sub> | 2.4298 | 510.26       | 0.0383 |
| S <sub>11</sub> | 2.1169 | 585.70       | 0.0070 | S <sub>26</sub> | 2.4550 | 505.03       | 0.0464 |
| S <sub>12</sub> | 2.1250 | 583.45       | 0.2535 | S <sub>27</sub> | 2.4771 | 500.52       | 0.0558 |
| S <sub>13</sub> | 2.1590 | 574.25       | 0.0312 | S <sub>28</sub> | 2.4850 | 498.93       | 0.0090 |
| S <sub>14</sub> | 2.1876 | 566.76       | 0.0676 | S <sub>29</sub> | 2.4920 | 497.53       | 0.1832 |
| S <sub>15</sub> | 2.2926 | 540.81       | 0.0049 | S <sub>30</sub> | 2.5059 | 494.77       | 0.0634 |

**Table S17** The PM6: BTP-x dimers with singlet charge transfer state (CT<sub>1</sub>), triplet charge transfer state (<sup>3</sup>CT<sub>1</sub>), triplet local excited state (T<sub>1</sub>) energy levels

|                | $E_{CT_1}$ | $E_{^3CT_1}$ | $E_{T_1}$ | $\Delta E_{^3CT_1-CT_1}$ | $\Delta E_{^3CT_1-T_1}$ |
|----------------|------------|--------------|-----------|--------------------------|-------------------------|
| BTP-eC9-dimer1 | 1.1150     | 1.1142       | 1.0990    | -0.0008                  | 0.0152                  |
| BTP-eC9-dimer2 | 1.1881     | 1.1872       | 1.0847    | -0.0009                  | 0.1025                  |
| BTP-eC9-dimer3 | 1.2280     | 1.1770       | 1.2402    | -0.0510                  | -0.0632                 |
| BTP-eC9-dimer4 | 1.1310     | 1.0832       | 1.1330    | -0.0478                  | -0.0498                 |
| BTP-S9-dimer1  | 1.3439     | 1.3016       | 1.2317    | -0.0423                  | 0.0699                  |
| BTP-S9-dimer2  | 1.3298     | 1.3546       | 1.2246    | 0.0248                   | 0.1300                  |
| BTP-S9-dimer3  | 1.1957     | 1.1919       | 1.0107    | -0.0038                  | 0.1812                  |
| BTP-S9-dimer4  | 1.3282     | 1.3158       | 1.1073    | -0.0124                  | 0.2085                  |
| BTP-S14-dimer1 | 1.1818     | 1.3956       | 1.0960    | 0.2138                   | 0.2996                  |
| BTP-S14-dimer2 | 1.2575     | 1.4799       | 1.1889    | 0.2224                   | 0.2910                  |
| BTP-S14-dimer3 | 1.2773     | 1.2885       | 1.0221    | 0.0112                   | 0.2664                  |
| BTP-S14-dimer4 | 1.3120     | 1.3188       | 1.2402    | 0.0068                   | 0.0786                  |

## Reference

- 1 C.-P. Hsu, *Acc. Chem. Res.*, 2009, **42**, 509–518.
- 2 V. Lemaire, M. Steel, D. Beljonne, J.-L. Brédas and J. Cornil, *J. Am. Chem. Soc.*, 2005, **127**, 6077–6086.
- 3 D. Rehm and A. Weller, *Isr. J. Chem.*, 1970, **8**, 259–271.
- 4 J. W. Verhoeven, H. J. van Ramesdonk, M. M. Groeneveld, A. C. Benniston and A. Harriman, *ChemPhysChem*, 2005, **6**, 2251–2260.
- 5 R. J. Cave and M. D. Newton, *Chem. Phys. Lett.*, 1996, **249**, 15–19.
